# Supplementary material for: Expression of the “4.2 ka event” in the southern Rocky Mountains, USA
Source: Copernicus journal article supplement (doi:10.5194/cp-18-1109-2022), 2022-05-23
Supplement: Supplementary file 1 [file cp-18-1109-2022-supplement.pdf]

Supplement of *Clim. Past*, 18, 1109–1124, 2022  
<https://doi.org/10.5194/cp-18-1109-2022-supplement>  
© Author(s) 2022. CC BY 4.0 License.

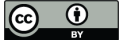

*Supplement of*

## **Expression of the “4.2 ka event” in the southern Rocky Mountains, USA**

**David T. Liefert and Bryan N. Shuman**

*Correspondence to:* David T. Liefert (dliefert@openspace.org)

The copyright of individual parts of the supplement might differ from the article licence.

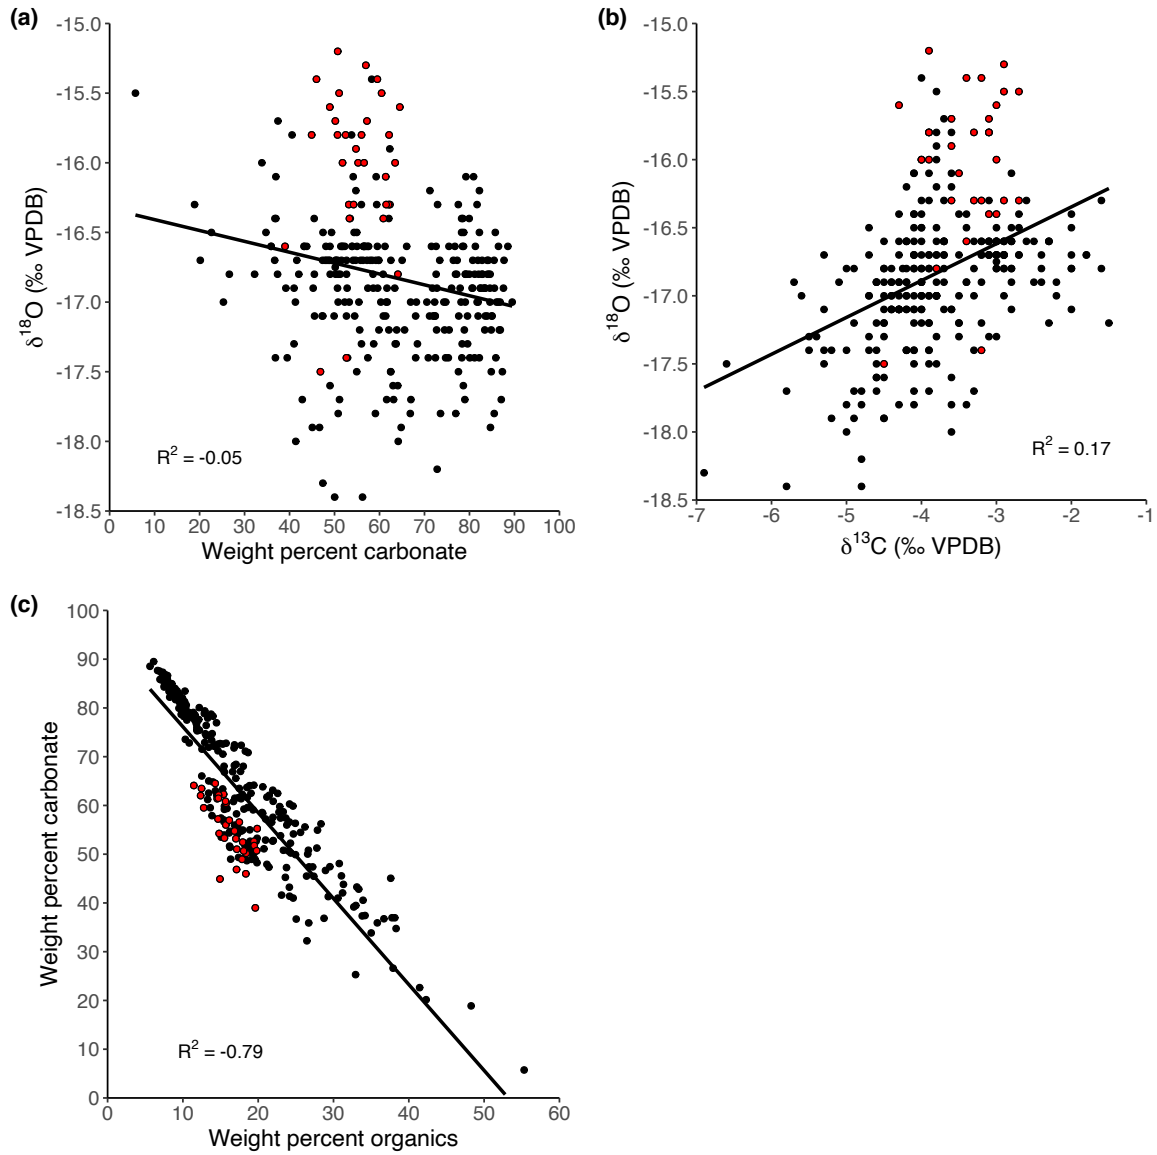

Figure S1. Cross plots of measured isotopic and sediment compositions at Highway 130 Lake (dots) with the linear trends (lines) and coefficients of determination. Samples with ages between 4.2 and 4 ka are colored red.
